# Supplementary material
Source: publisher figshare collection journal article supplement (https://acs.figshare.com/ndownloader/files/4137448)

Reduction of *Giardia* cysts from WI to DS measured by FCM and IFM

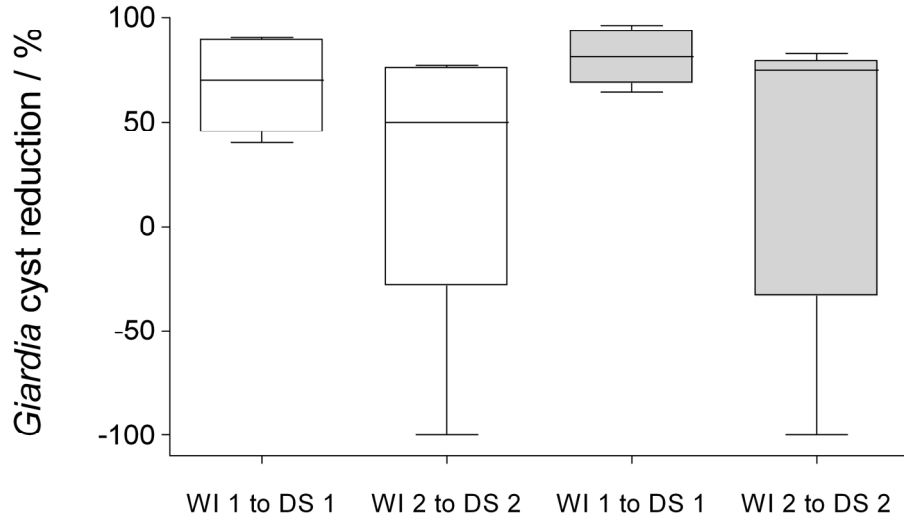

86x52mm (600 x 600 DPI)

Supplement: Supplementary file 1 [file 4137448]
